# Supplementary material for: A rise in HFC-23 emissions from eastern Asia since 2015
Source: Copernicus journal article supplement (doi:10.5194/acp-23-9401-2023), 2023-08-25
Supplement: Supplementary file [file acp-23-9401-2023-supplement.pdf]

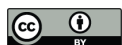

*Supplement of*

## **A rise in HFC-23 emissions from eastern Asia since 2015**

**Hyeri Park et al.**

*Correspondence to:* Sunyoung Park (sparky@knu.ac.kr)

The copyright of individual parts of the supplement might differ from the article licence.

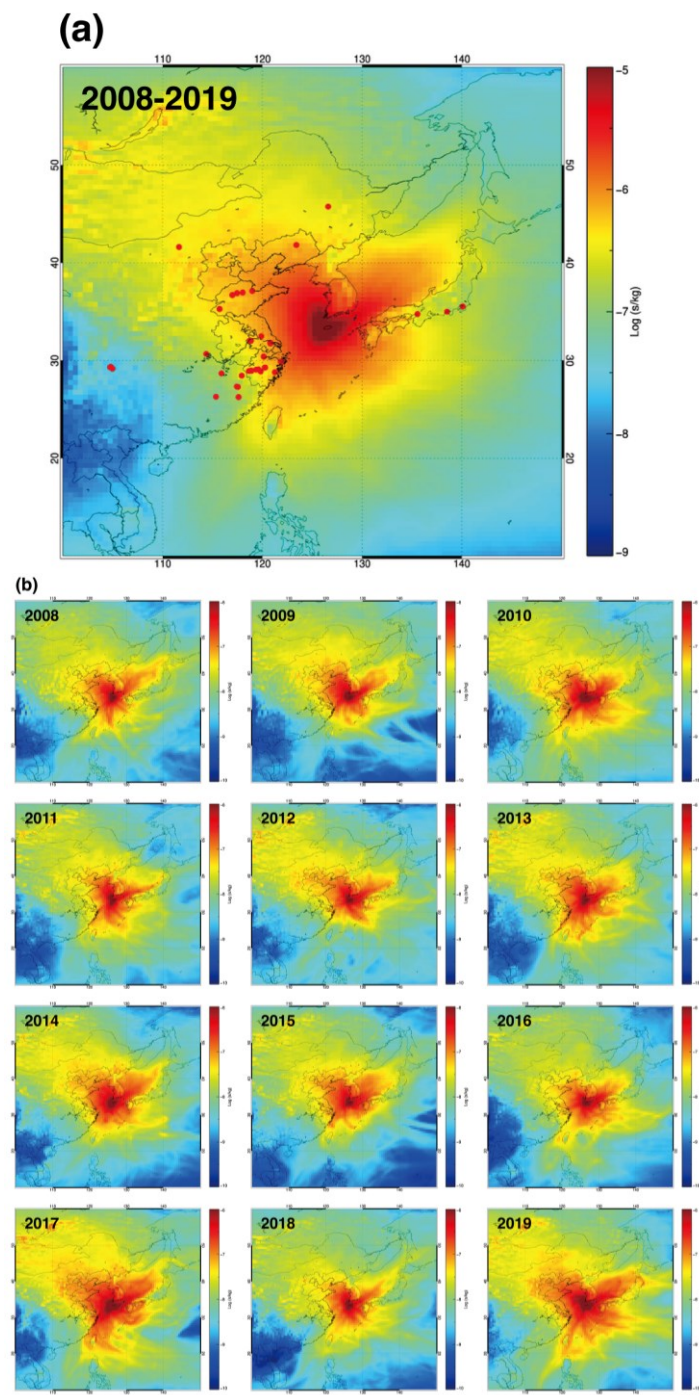

20

Figure S1: The sensitivity of the measurements to emissions of HFC-23 (a) for 2008-2019 and (b) for each year between 2008–2019. The figure (b) shows that the mean sensitivity of the observations to emissions from the eastern Asia region did not change substantially throughout this period. The red circles indicate locations of known HCFC-22 production plants.

25 **HCFC-22 production in China**

Note that under the Montreal Protocol, the use of HCFC-22 as a feedstock has been exempted from the phase-out schedule in some countries, including China. According to the TEAP 2021 report, the proportion of China's HCFC-22 production for feedstock use has been increasing relative to HCFC-22 production for dispersive use (Figure S2). Therefore, the lack of a clear decline in HCFC-22 production even after 2013 (Figure S3) could be due to an increase in production for feedstock use in

30 China.

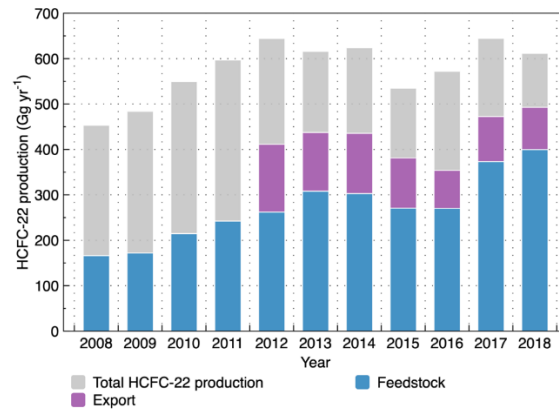

**Figure S2: Total HCFC-22 productions of China (stacked bars). Blue segments denote production for feedstock uses and purple for export.**

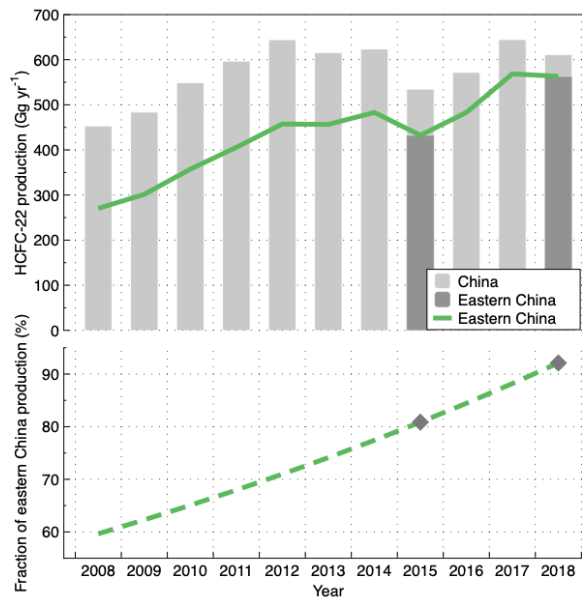

35 **Figure S3: (a) Total HCFC-22 productions of China (light gray bars) and HCFC-22 productions of eastern China in 2015 and 2018 (dark gray bars) (TEAP, 2021). (b) Inferred annual fractions of eastern China HCFC-22 productions to Chinese total productions (dark gray rhombi), extrapolated eastern China HCFC-22 production fractions for other years (green dashed line).**

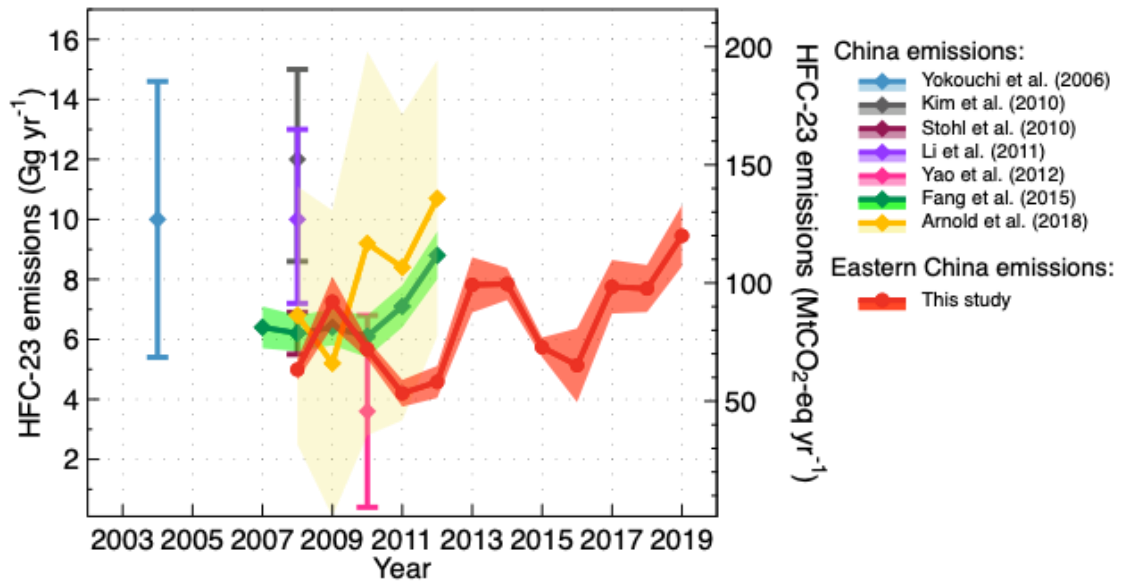

40

Figure S4: HFC-23 emissions estimates in eastern China (red line), in comparison with previous top-down estimates of Chinese HFC-23 emissions.

45 Table S1: Information on HCFC-22 production factories in China

|    | Company Name                                                    | Province       | Information                                                                                                                             | Location |        | CDM Participation Period | HCFC-22 production (ktonnes) |
|----|-----------------------------------------------------------------|----------------|-----------------------------------------------------------------------------------------------------------------------------------------|----------|--------|--------------------------|------------------------------|
|    |                                                                 |                |                                                                                                                                         | Lat.     | Long.  |                          |                              |
| 1  | Jiangsu Meilan Chemical Co., Ltd                                | Jiangsu        | <a href="https://cdm.unfccc.int/Projects/DB/JQA1144312006.34/view">https://cdm.unfccc.int/Projects/DB/JQA1144312006.34/view</a>         | 32.50    | 119.89 | Dec 2006 - Nov 2013      | 63.9                         |
| 2  | Changshu Haike_3F Changsu                                       | Jiangsu        | <a href="https://cdm.unfccc.int/Projects/DB/JQA1177467814.44/view">https://cdm.unfccc.int/Projects/DB/JQA1177467814.44/view</a>         | 31.78    | 120.82 | May 2008 - Apr 2015      | 40.9                         |
| 3  | Changshu 3 Zhonghao New Chemical Materials Co. Ltd.             | Jiangsu        | Company websites                                                                                                                        | 31.81    | 120.79 | -                        | -                            |
| 4  | Changshu Arkema 3F Fluorine Chemical Co. Ltd.                   | Jiangsu        | TEAP, 2017                                                                                                                              | 31.75    | 120.80 | -                        | 30.7                         |
| 5  | Nanjing Jiling Refrigeration Technology Co., Ltd                | Jiangsu        | Company websites                                                                                                                        | 32.04    | 118.77 | -                        | -                            |
| 6  | Jiangsu Huafu Poly Environmental Protection Technology Co., Ltd | Jiangsu        | Company websites                                                                                                                        | 32.02    | 118.86 | -                        | -                            |
| 7  | Shandong Dongyue Chemical Co., Ltd                              | Shandong       | <a href="https://cdm.unfccc.int/Projects/DB/DNV-CUK1136817489.89/view">https://cdm.unfccc.int/Projects/DB/DNV-CUK1136817489.89/view</a> | 36.97    | 118.03 | Jan 2007 - Dec 2013      | 173.3                        |
| 8  | China Fluoro Technology Co., Ltd                                | Shandong       | <a href="https://cdm.unfccc.int/Projects/DB/DNV-CUK1182313000.09/view">cdm.unfccc.int/Projects/DB/DNV-CUK1182313000.09/view</a>         | 36.71    | 117.00 | Sep 2007 - Sep 2014      | -                            |
| 9  | Shandong ZhongFu                                                | Shandong       | TEAP, 2017                                                                                                                              | 36.90    | 117.46 | -                        | NaN                          |
| 10 | Jinan 3F Fluoro Chemical Co. Ltd.                               | Shandong       | Company websites                                                                                                                        | 36.69    | 116.99 | -                        | -                            |
| 11 | Shandong Haihua Group Co. Ltd.                                  | Shandong       | Company websites                                                                                                                        | 37.12    | 118.99 | -                        | -                            |
| 12 | Shandong Danbu Chemical Co., Ltd                                | Shandong       | Company websites                                                                                                                        | 35.27    | 115.71 | -                        | -                            |
| 13 | Dongyang Chemical Co., Ltd                                      | Zhejiang       | Company websites                                                                                                                        | 29.27    | 120.25 | -                        | -                            |
| 14 | No.1 Zhejiang JuHua Co., Ltd                                    | Zhejiang       | <a href="https://cdm.unfccc.int/Projects/DB/DNV-CUK113525248.44/view">https://cdm.unfccc.int/Projects/DB/DNV-CUK113525248.44/view</a>   | 28.90    | 118.90 | Aug 2006 - July 2013     | -                            |
| 15 | No. 2 Zhejiang JuHua Co., Ltd                                   | Zhejiang       | <a href="https://cdm.unfccc.int/Projects/DB/SGS-UKL1169224204.45/view">https://cdm.unfccc.int/Projects/DB/SGS-UKL1169224204.45/view</a> | 28.90    | 118.90 | Apr 2007 - Apr 2014      | -                            |
| 16 | Zhengjiang Quhua Co., Ltd                                       | Zhejiang       | TEAP, 2017                                                                                                                              | 28.91    | 118.87 | -                        | 49.2                         |
| 17 | Zhejiang Lanxi Juhua Fluorine Chemicals Co., Ltd.               | Zhejiang       | TEAP, 2017                                                                                                                              | 29.22    | 119.44 | -                        | 20.6                         |
| 18 | Yingpeng Chemical Co., Ltd                                      | Zhejiang       | <a href="https://cdm.unfccc.int/Projects/DB/DNV-CUK1215776483.62/view">cdm.unfccc.int/Projects/DB/DNV-CUK1215776483.62/view</a>         | 28.90    | 120.01 | Apr 2009 - Apr 2016      | -                            |
| 19 | Limin Chemical Co., Ltd                                         | Zhejiang       | <a href="https://cdm.unfccc.int/Projects/DB/JQA1154594999.24/view">https://cdm.unfccc.int/Projects/DB/JQA1154594999.24/view</a>         | 34.37    | 118.32 | Jan 2007 - Dec 2013      | 17.5                         |
| 20 | Zhejiang Dongyang Chemical Co., Ltd                             | Zhejiang       | <a href="https://cdm.unfccc.int/Projects/DB/JQA1154593239.79/view">https://cdm.unfccc.int/Projects/DB/JQA1154593239.79/view</a>         | 29.27    | 120.25 | Nov 2006 - Oct 2013      | -                            |
| 21 | Zhejiang Sanmei Chemical Incorporated Company                   | Zhejiang       | TEAP, 2017                                                                                                                              | 28.89    | 119.83 | -                        | 14.4                         |
| 22 | Zhejian Pengyou                                                 | Zhejiang       | TEAP, 2017                                                                                                                              | 29.09    | 119.61 | -                        | 10                           |
| 23 | Jinhua Yonghe Fluorochemical                                    | Zhejiang       | TEAP, 2017                                                                                                                              | 29.07    | 119.38 | -                        | 12                           |
| 24 | Zhejiang Jusheng Fluorochemical Co.=Zhejian Quhua               | Zhejiang       | Inside Climate News                                                                                                                     | 28.97    | 118.87 | -                        | -                            |
| 25 | Zhejiang Yonghe New type Refrigerant Co. Ltd.                   | Zhejiang       | Company websites                                                                                                                        | 28.95    | 118.92 | -                        | -                            |
| 26 | Ningbo Koman's Refrigeration Industry Co. Ltd.                  | Zhejiang       | Company websites                                                                                                                        | 29.88    | 121.88 | -                        | -                            |
| 27 | Quzhou sailtel Chemical Co., Ltd                                | Zhejiang       | Company websites                                                                                                                        | 28.93    | 118.66 | -                        | -                            |
| 28 | Hangzhou Wula Chemical Co., Ltd                                 | Zhejiang       | Company websites                                                                                                                        | 30.40    | 120.14 | -                        | -                            |
| 29 | Dongyang Chemical Co., Ltd                                      | Zhejiang       | Company websites                                                                                                                        | 29.27    | 120.25 | -                        | -                            |
| 30 | Fujian Shaowu Youghe Jintang New Materials Co.                  | Fujian         | Inside Climate News                                                                                                                     | 27.30    | 117.55 | -                        | -                            |
| 31 | Fujian Sannong New Materials Co., Ltd                           | Fujian         | Inside Climate News                                                                                                                     | 26.26    | 117.61 | -                        | -                            |
| 32 | Fujian Haidefu New Materials Co., Ltd                           | Fujian         | Inside Climate News                                                                                                                     | 27.34    | 117.44 | -                        | -                            |
| 33 | Changjiang Chemical Plant                                       | Hubei          | Company websites                                                                                                                        | 30.68    | 114.37 | -                        | -                            |
| 34 | Harbin Sanyi Refrigeration Equipment Co., Ltd                   | Heilongjiang   | Company websites                                                                                                                        | 45.75    | 126.60 | -                        | -                            |
| 35 | Inner Mongolia Yonghe Fluorochemical Co., Ltd                   | Inner Mongolia | Inside Climate News                                                                                                                     | 41.61    | 111.64 | -                        | -                            |
| 36 | Jingxi YingGuang                                                | Jiangxi        | TEAP, 2017                                                                                                                              | 28.45    | 117.93 | -                        | 0                            |
| 37 | Jiangxi Sanmei Chemical                                         | Jiangxi        | TEAP, 2017                                                                                                                              | 26.29    | 115.35 | -                        | 14                           |
| 38 | Shenyang Guyun Refrigeration Equipment Co., Ltd                 | Liaoning       | Company websites                                                                                                                        | 41.82    | 123.41 | -                        | -                            |
| 39 | Zhonghao Chenguang Research Institute of Chemical Industry      | Sichuan        | <a href="https://cdm.unfccc.int/Projects/DB/JQA1163409153.5/view">https://cdm.unfccc.int/Projects/DB/JQA1163409153.5/view</a>           | 29.17    | 104.97 | May 2007 - Apr 2014      | 17.2                         |
| 40 | Sichuan Zigong Honghe Chemical Co., Ltd.                        | Sichuan        | TEAP, 2017                                                                                                                              | 29.35    | 104.80 | -                        | NaN                          |
| 41 | Zigong City refrigerant factory                                 | Sichuan        | Company websites                                                                                                                        | 29.31    | 104.73 | -                        | -                            |
| 42 | Zigong City reactor Chemical plant                              | Sichuan        | Company websites                                                                                                                        | 29.35    | 104.77 | -                        | -                            |

## 50 Observations of atmospheric HCFC-22 and estimation of top-down emissions in eastern China

High-frequency observation data of HCFC-22 at Gosan for 2008-2018 (Figure S6) show persistent pollution events, clearly implying that HCFC-22 emissions have been emanating from the surrounding regions, while the regional baseline concentrations of HCFC-22 show a similar increasing trend as the global NH baseline (green dots in Figure S6 for the Mace Head station). It should be noted that HCFC-22 baseline concentrations at Gosan drop periodically in summer due to strong  
55 intrusion of SH tropical air masses with low HCFC-22 concentrations during the East Asia summer monsoon (Li et al., 2018).

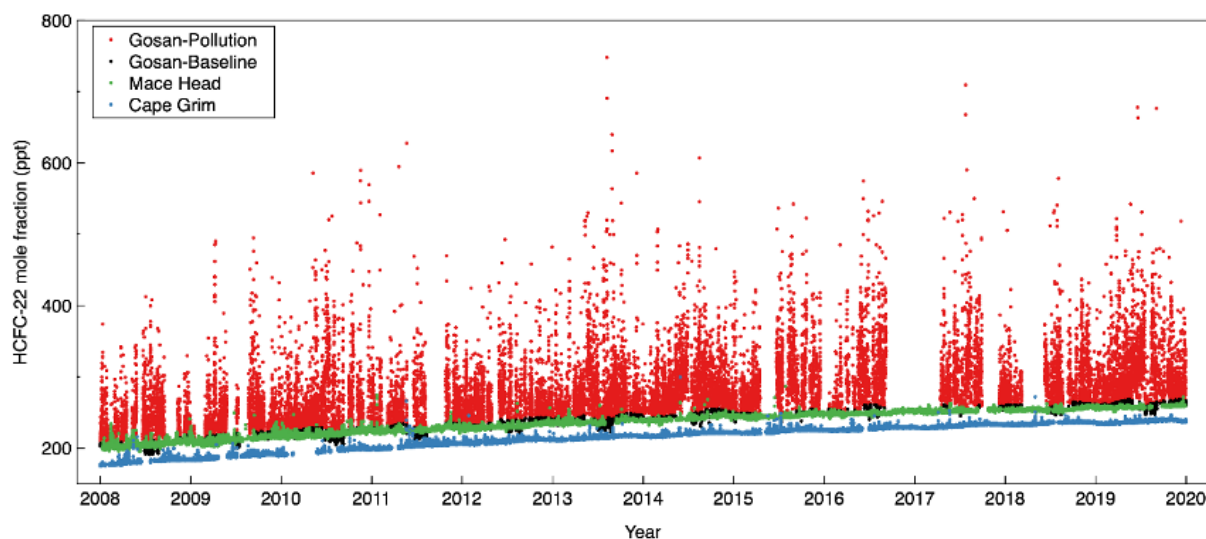

**Figure. S5: Atmospheric HCFC-22 concentrations observed from 2008 to 2019 at Gosan. The green and blue dots show HCFC-22 concentrations observed at Mace Head and Cape Grim, respectively, for comparison.**

60

To confirm the link of HFC-23 emissions in eastern China to HCFC-22 production, we estimated HCFC-22 emissions from eastern China using the same inverse framework as for HFC-23 (Figure S7(a)). The continuing rise in the emissions seems to indicate that the contribution of dispersive use is still significant, although its production for dispersive use is currently being phased out in developing countries by the Montreal Protocol. HCFC-22 emissions from the whole of China were inferred from  
65 the fraction of the population in eastern China. Results are consistent not only with previous studies but also with the inventory-based HCFC-22 emissions as shown in Figure S7(b), suggesting that population density still serves as good proxy for HCFC-22 emissions, and that the bottom-up emissions for the whole of China are relatively well-defined.

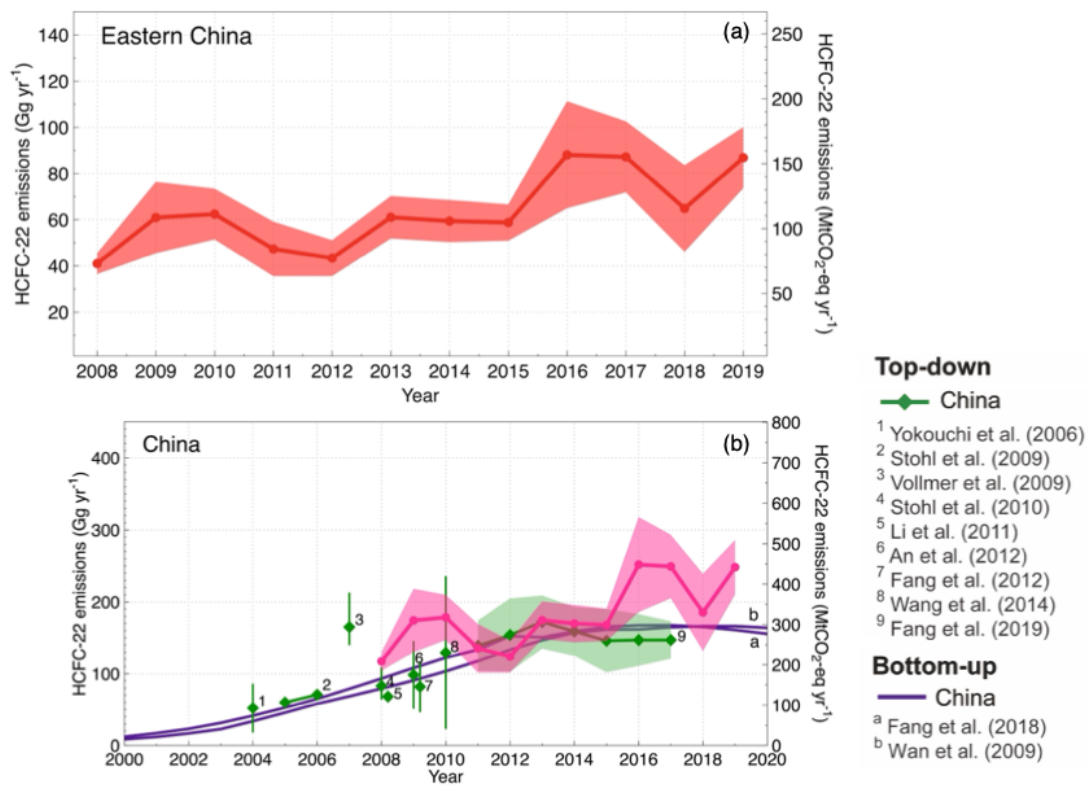

70 **Figure S6:** (a) Eastern Chinese emissions of HCFC-22 (red circles) derived from the atmospheric observations at Gosan, (b) Our HCFC-22 emission estimates by the whole of China (pink circles), determined by scaling up the eastern Chinese emissions by the fraction of the population (35 %) that reside in eastern China (Rigby et al., 2019). Top-down Chinese emissions suggested in previous studies and bottom-up estimates are denoted by green rhombi and purple lines, respectively.

### 75 **Three different spatial distributions of *a priori* emissions**

Our inverse modelling results represent the mean and  $2\text{-}\sigma$  uncertainty of 27 different model runs, where each set of three different *a priori* distributions (Figure S8) have 9 combinations of different *a priori* emission magnitudes. The first priori distribution is the “Population” *a priori*, determined based on the 2010 World population distribution (Warszawski et al., 2017). Population distribution has often been used as a reasonable first approximation when more specific information is not available (Stohl et al., 2010; Fang et al., 2019). The second priori distribution is the “Asiaflat” *a priori*, where the emissions within each country (whole of China, North Korea, South Korea, and whole of Japan) were evenly spread (Rigby et al., 2019; Park et al., 2021). This flattening may cause large *a priori* emissions to be allocated to western China and eastern Japan, where transport sensitivity was relatively low, while at the same time significantly lowering *a priori* emissions in eastern China and western Japan compared to other *a priori* distributions (Kim et al., 2021). The third priori distribution is the “EastAsiaflat” *a priori*, where the population distribution-based emissions are regionally flattened. Flattening regions are determined as the high sensitivity in the model domain (most of the high sensitivity area has less than or equal to  $1^\circ$  by  $1^\circ$ ), i.e., eastern China, South Korea, North Korea, and western Japan. The region denoted “eastern China” contains nine provinces (Anhui, Beijing, Hebei, Jiangsu, Liaoning, Shandong, Shanghai, Tianjin, and Zhejiang) and “western Japan” contains four regions (Chūgoku, Kansai, Kyūshū & Okinawa and Shikoku) (Rigby et al., 2019; Park et al., 2021; Kim et al., 2021). “EastAsiaflat” *a priori* can be unbiased in terms of emission locations, such that the distribution of emissions in the posterior could point to likely emission hot spots, but such inference is reasonable only in regions where the influence of the observations is relatively strong. The *a priori* emissions were kept constants for all years, based on the 2008 emissions. For each *a priori* distribution, we tested 9 different combinations of *a priori* emission magnitudes and uncertainties, which are summarized in Table S2.

Note that our annual HFC-23 results represent the mean of 18 results from two different model runs *a priori* excluding “Asiaflat” *a priori*, because many HCFC-22 factories are located in eastern China, and thus HFC-23 emissions estimates for eastern China using “Asiaflat” *a priori* could be underestimated.



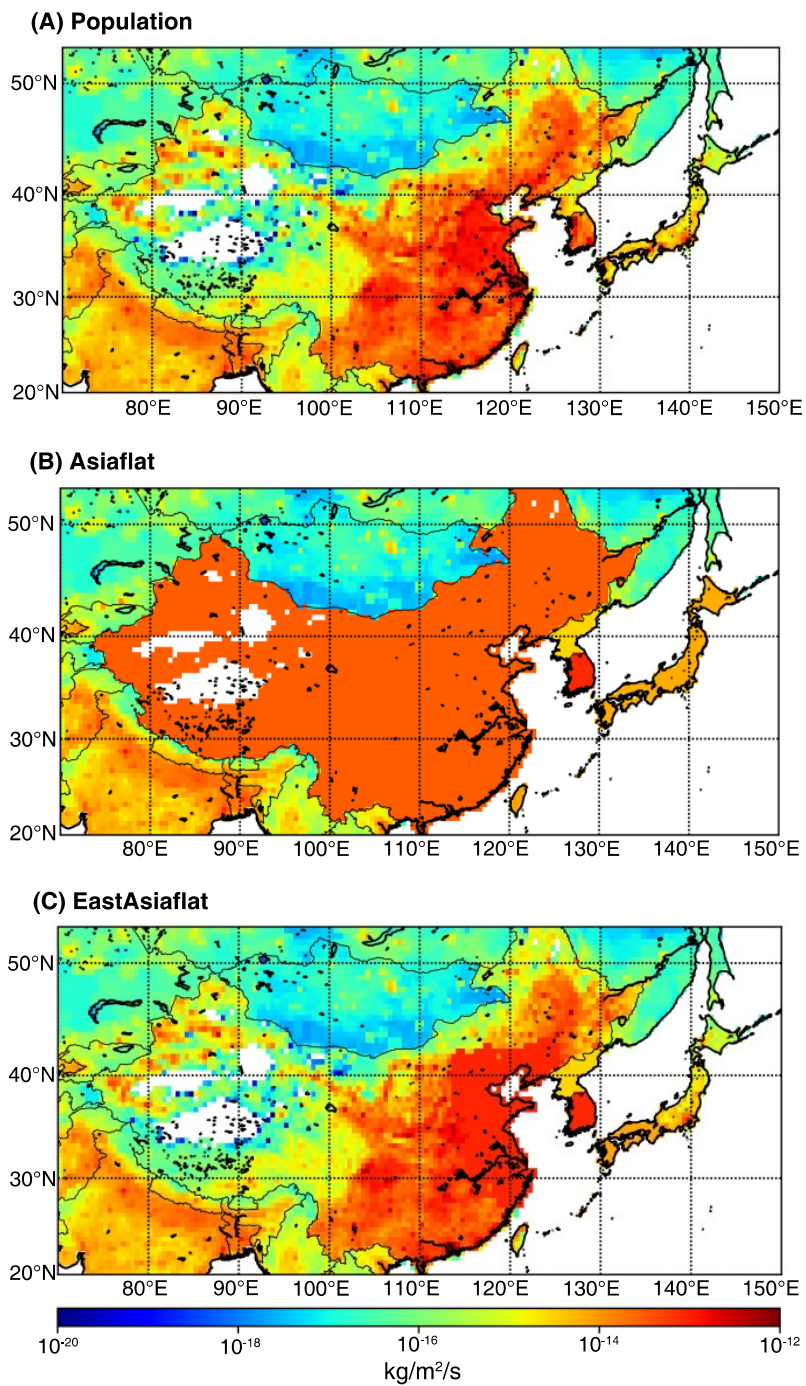

100 **Figure S7: Three different spatial distributions of *a priori* used in this study. (a) *a priori* emissions map based on populations distribution. (b) flat emissions for each country. (c) flat emissions only in the regions with high sensitivity (eastern China, North Korea, South Korea and western Japan).**

105 **Table S2: List of 9 *a priori* configurations, with corresponding errors, applied to each *a priori* distribution. For each *a priori* configuration, the initial *a priori* estimate is multiplied by the listed scaling factor.**

| <i>A priori</i> Emissions |        |           |              |        |           |              |        |           |
|---------------------------|--------|-----------|--------------|--------|-----------|--------------|--------|-----------|
| A priori Dist.            | priori | Error (%) | priori Dist. | priori | Error (%) | priori Dist. | priori | Error (%) |
|                           | × 0.5  | 100       |              | × 0.5  | 100       |              | × 0.5  | 100       |
|                           | × 1    | 50        |              | × 1    | 50        |              | × 1    | 50        |
|                           | × 2    | 25        |              | × 2    | 25        |              | × 2    | 25        |
|                           | × 0.5  | 200       |              | × 0.5  | 200       |              | × 0.5  | 200       |
| Population                | × 1    | 100       | Asiaflat     | × 1    | 100       | EastAsiaflat | × 1    | 100       |
|                           | × 2    | 50        |              | × 2    | 50        |              | × 2    | 50        |
|                           | × 0.5  | 300       |              | × 0.5  | 300       |              | × 0.5  | 300       |
|                           | × 1    | 150       |              | × 1    | 150       |              | × 1    | 150       |
|                           | × 2    | 75        |              | × 2    | 75        |              | × 2    | 75        |

### Model validation based on CFC-11 emissions estimate from eastern China

110 To validate the optimization of our inversion framework, we analyzed CFC-11 emissions from eastern China using Gosan CFC-11 concentration data for 2008–2019. Top-down emissions of CFC-11 in East Asia were well-defined in a recent study (Park et al., 2021) which used multiple inversion methods.

Our results (Figure S9) showed good convergence among the runs for the same *a priori* distribution set, but relatively large (not statistically significant) difference between different *a priori* distributions, suggesting that *a priori* distributions have an  
115 impact on the a posteriori, and thus uncertainties associated with different *a priori* settings need to be considered to derive the full posteriori uncertainties.

Figure S10 shows that our CFC-11 emission estimates for eastern China are consistent within uncertainties with previously reported results from four different inverse methods that used Gosan observation data (only) (Park et al., 2021). Since the previous study with four different inverse models had used “Asiaflat” *a priori*, our estimation was also made with the same  
120 priori for direct comparison.

We took the mean of the a posteriori annual inversion results from 27 independent inversions with different *a priori* settings (see Table S2) as our final estimates of CFC-11 emissions from eastern China for 2008–2019 (Figure S11 and Table S3) and their uncertainties were defined as  $2\text{-}\sigma$  of the resulting a posteriori emissions (95 % uncertainty), because the uncertainty of each inversion run can be considered fully correlated with each other. Our final emissions estimates of CFC-11 for eastern  
125 China are also consistent with previously reported results from four different inverse methods within uncertainties (Figure S11).

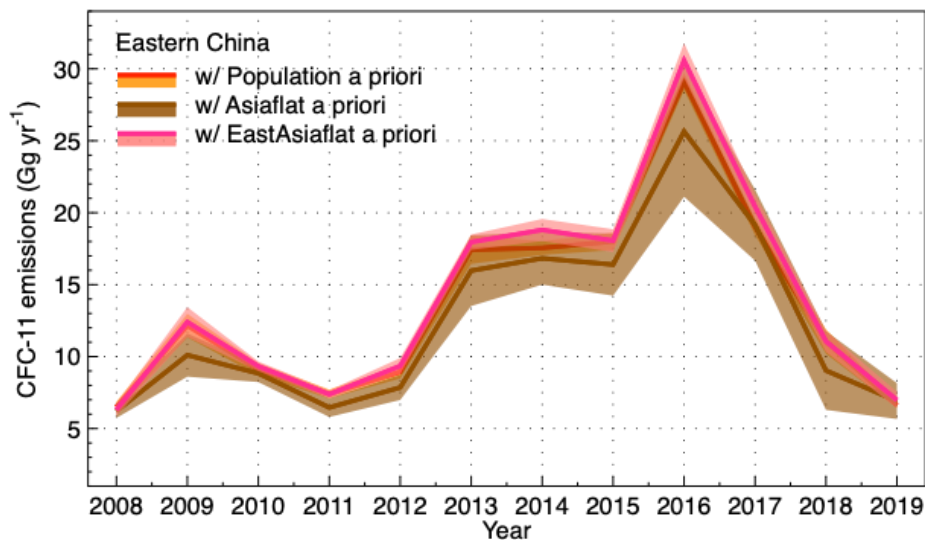

130 **Figure S8:** CFC-11 emissions from eastern China derived using three different *a priori* distributions: “Population”, “Asiaflat”, “EastAsiaflat” *a prioris*. Each line represents the annual mean of 9 different model set-ups for each *a priori* distribution. Shading denotes  $2\text{-}\sigma$  uncertainties.

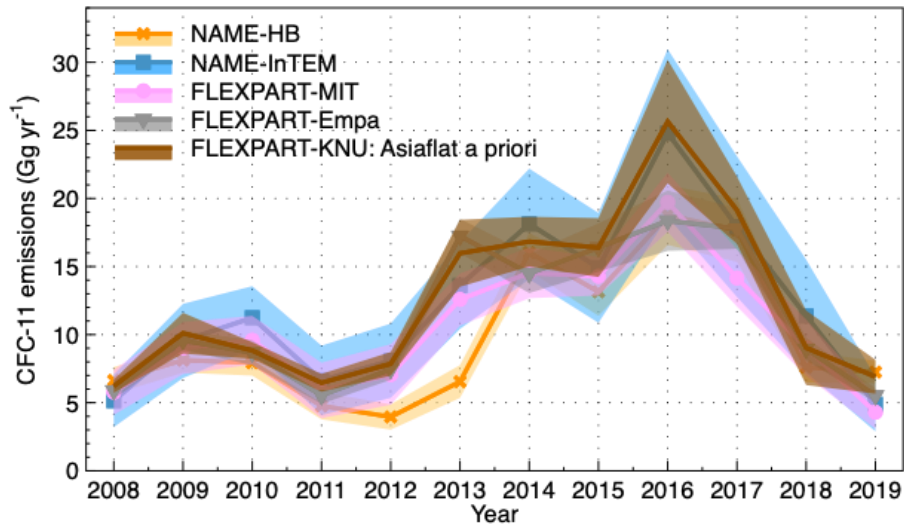

135 Figure S9: CFC-11 emissions from eastern China derived using the “Asiaflat” *a priori* distribution. Top-down emissions using FLEXPART-KNU (brown line) are compared to previously reported emissions from four different inverse methods using the same Gosan data for 2008–2019: NAME-HB (yellow crosses), NAME-InTEM (blue squares), FLEXPART-MIT (pink circles) and FLEXPART-Empa (gray triangles).

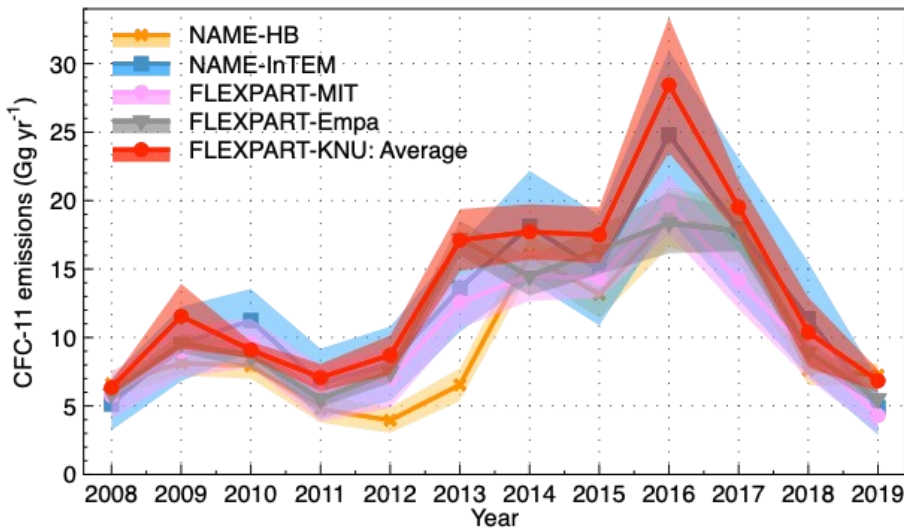

140 Figure S10: CFC-11 emissions estimate for eastern China derived in this study (FLEXPART-KNU, red circles) compared to previously derived emissions. Our annual results represent the mean of 27 different model runs, where each set of three different *a priori* distributions have 9 combinations of different emission magnitudes and 2- $\sigma$  uncertainties (shading).

**Table S3: Top-down emissions (Gg yr<sup>-1</sup>) of CFC-11 and HCFC-22 for eastern China**

| Year | CFC-11        |       |       | HCFC-22       |        |       |
|------|---------------|-------|-------|---------------|--------|-------|
|      | Eastern China |       |       | Eastern China |        |       |
|      | mean          | max   | min   | mean          | max    | min   |
| 2008 | 6.34          | 6.81  | 5.86  | 40.99         | 45.53  | 36.44 |
| 2009 | 11.55         | 13.92 | 9.18  | 60.96         | 76.40  | 45.51 |
| 2010 | 9.09          | 9.70  | 8.48  | 62.45         | 73.46  | 51.44 |
| 2011 | 7.08          | 8.07  | 6.09  | 47.36         | 59.20  | 35.52 |
| 2012 | 8.72          | 10.15 | 7.29  | 43.37         | 51.17  | 35.56 |
| 2013 | 17.12         | 19.39 | 14.85 | 61.07         | 70.27  | 51.87 |
| 2014 | 17.73         | 19.73 | 15.72 | 59.43         | 68.57  | 50.30 |
| 2015 | 17.48         | 19.54 | 15.43 | 58.80         | 66.67  | 50.93 |
| 2016 | 28.44         | 33.39 | 23.48 | 88.13         | 111.27 | 64.98 |
| 2017 | 19.53         | 21.49 | 17.56 | 87.23         | 102.62 | 71.84 |
| 2018 | 10.38         | 12.92 | 7.84  | 64.89         | 83.67  | 46.12 |
| 2019 | 6.84          | 7.66  | 6.01  | 86.89         | 100.13 | 73.64 |

## SI. References

- An, X., Henne, S., Yao, B., Vollmer, M. K., Zhou, L., and Li, Y.: Estimating emissions of HCFC-22 and CFC-11 in China by atmospheric observations and inverse modeling, *Science China Chemistry*, 55, 2233-2241, 2012.
- Arnold, T., Manning, A. J., Kim, J., Li, S., Webster, H., Thomson, D., Mühle, J., Weiss, R. F., Park, S., and O'doherty, S.:  
150 Inverse modelling of CF<sub>4</sub> and NF<sub>3</sub> emissions in East Asia, *Atmospheric Chemistry and Physics*, 18, 13305-13320, 2018.
- Fang, X., Wu, J., Su, S., Han, J., Wu, Y., Shi, Y., Wan, D., Sun, X., Zhang, J., and Hu, J.: Estimates of major anthropogenic halocarbon emissions from China based on interspecies correlations, *Atmospheric environment*, 62, 26-33, 2012.
- Fang, X., Stohl, A., Yokouchi, Y., Kim, J., Li, S., Saito, T., Park, S., and Hu, J.: Multiannual top-down estimate of HFC-23 emissions in East Asia, *Environmental Science & Technology*, 49, 4345-4353, 2015.
- 155 Fang, X., Ravishankara, A., Velders, G. J., Molina, M. J., Su, S., Zhang, J., Hu, J., and Prinn, R. G.: Changes in emissions of ozone-depleting substances from China due to implementation of the Montreal Protocol, *Environmental science & technology*, 52, 11359-11366, 2018.
- Fang, X., Yao, B., Vollmer, M., Reimann, S., Liu, L., Chen, L., Prinn, R., and Hu, J.: Changes in HCFC emissions in China during 2011–2017, *Geophysical Research Letters*, 46, 10034-10042, 2019.
- 160 Inside Climate News: China Moves to Freeze Production of Climate Super-Pollutants But Lacks a System to Monitor Emissions, 2022. <https://insideclimatenews.org/news/21012022/china-super-pollutant-emissions/>
- Kim, J., Li, S., Kim, K. R., Stohl, A., Mühle, J., Kim, S. K., Park, M. K., Kang, D. J., Lee, G., and Harth, C. M.: Regional atmospheric emissions determined from measurements at Jeju Island, Korea: Halogenated compounds from China, *Geophysical Research Letters*, 37, 2010.
- 165 Kim, J., Thompson, R., Park, H., Bogle, S., Mühle, J., Park, M. K., Kim, Y., Harth, C. M., Salameh, P. K., and Schmidt, R.: Emissions of tetrafluoromethane (CF<sub>4</sub>) and hexafluoroethane (C<sub>2</sub>F<sub>6</sub>) from East Asia: 2008 to 2019, *Journal of Geophysical Research: Atmospheres*, 126, e2021JD034888, 2021.
- Li, S., Kim, J., Kim, K.-R., Mühle, J., Kim, S.-K., Park, M.-K., Stohl, A., Kang, D.-J., Arnold, T., and Harth, C. M.: Emissions of halogenated compounds in East Asia determined from measurements at Jeju Island, Korea, *Environmental science &*  
170 *technology*, 45, 5668-5675, 2011.
- Li, S., Park, S., Lee, J.-Y., Ha, K.-J., Park, M.-K., Jo, C., Oh, H., Mühle, J., Kim, K.-R., and Montzka, S.: Chemical evidence of inter-hemispheric air mass intrusion into the Northern Hemisphere mid-latitudes, *Scientific reports*, 8, 1-7, 2018.
- Park, S., Western, L. M., Saito, T., Redington, A. L., Henne, S., Fang, X., Prinn, R. G., Manning, A. J., Montzka, S. A., and Fraser, P. J.: A decline in emissions of CFC-11 and related chemicals from eastern China, *Nature*, 590, 433-437, 2021.
- 175 Rigby, M., Park, S., Saito, T., Western, L., Redington, A., Fang, X., Henne, S., Manning, A., Prinn, R., and Dutton, G.: Increase in CFC-11 emissions from eastern China based on atmospheric observations, *Nature*, 569, 546-550, 2019.
- Simmonds, P. G., Rigby, M., McCulloch, A., Vollmer, M. K., Henne, S., Mühle, J., O'Doherty, S., Manning, A. J., Krummel, P. B., and Fraser, P. J.: Recent increases in the atmospheric growth rate and emissions of HFC-23 (CHF<sub>3</sub>) and the link to HCFC-22 (CHClF<sub>2</sub>) production, 2018.
- 180 Stanley, K. M., Say, D., Mühle, J., Harth, C. M., Krummel, P. B., Young, D., O'Doherty, S. J., Salameh, P. K., Simmonds, P. G., and Weiss, R. F.: Increase in global emissions of HFC-23 despite near-total expected reductions, *Nature communications*, 11, 1-6, 2020.
- Stohl, A., Seibert, P., Arduini, J., Eckhardt, S., Fraser, P., Grealley, B., Lunder, C., Maione, M., Mühle, J., and O'doherty, S.: An analytical inversion method for determining regional and global emissions of greenhouse gases: Sensitivity studies and  
185 application to halocarbons, *Atmospheric Chemistry and Physics*, 9, 1597-1620, 2009.
- Stohl, A., Kim, J., Li, S., O'Doherty, S., Mühle, J., Salameh, P. K., Saito, T., Vollmer, M. K., Wan, D., and Weiss, R. F.: Hydrochlorofluorocarbon and hydrofluorocarbon emissions in East Asia determined by inverse modeling, *Atmospheric Chemistry and Physics*, 10, 3545-3560, 2010.

- TEAP: Technology and Economic Assessment Panel of the Montreal Protocol: Assessment Report, United Nations Environment Programme, Nairobi, Kenya, 2017.
- TEAP: Technology and Economic Assessment Panel of the Montreal Protocol: Assessment Report, United Nations Environment Programme, Nairobi, Kenya, 2021.
- Vollmer, M., Zhou, L., Grealley, B., Henne, S., Yao, B., Reimann, S., Stordal, F., Cunnold, D., Zhang, X., and Maione, M.: Emissions of ozone-depleting halocarbons from China, *Geophysical Research Letters*, 36, 2009.
- 195 Wan, D., Xu, J., Zhang, J., Tong, X., and Hu, J.: Historical and projected emissions of major halocarbons in China, *Atmospheric Environment*, 43, 5822-5829, 2009.
- Wang, C., Shao, M., Huang, D., Lu, S., Zeng, L., Hu, M., and Zhang, Q.: Estimating halocarbon emissions using measured ratio relative to tracers in China, *Atmospheric Environment*, 89, 816-826, 2014.
- Warszawski, L., Frieler, K., Huber, V., Piontek, F., Serdeczny, O., Zhang, X., Tang, Q., Pan, M., Tang, Y., and Tang, Q.: 200 Center for International Earth Science Information Network—CIESIN—Columbia University. (2016). Gridded population of the World, Version 4 (GPWv4): Population density. Palisades, NY: NASA Socioeconomic Data and Applications Center (SEDAC). doi: 10.7927/H4NP22DQ, *Atlas of Environmental Risks Facing China Under Climate Change*, 228, 2017.
- Yao, B., Vollmer, M., Zhou, L., Henne, S., Reimann, S., Li, P., Wenger, A., and Hill, M.: In-situ measurements of atmospheric hydrofluorocarbons (HFCs) and perfluorocarbons (PFCs) at the Shangdianzi regional background station, China, *Atmospheric*
- 205 *Chemistry and Physics*, 12, 10181-10193, 2012.
- Yokouchi, Y., Taguchi, S., Saito, T., Tohjima, Y., Tanimoto, H., and Mukai, H.: High frequency measurements of HFCs at a remote site in east Asia and their implications for Chinese emissions, *Geophysical research letters*, 33, 2006.
